# Supplementary material
Source: PubMed Central journal article supplement (PMC6016470)
Supplement: supp_RA117.001385_134557_1_supp_129477_p7vqjw.pdf [file supp_RA117.001385_134557_1_supp_129477_p7vqjw.pdf]

## Supporting information

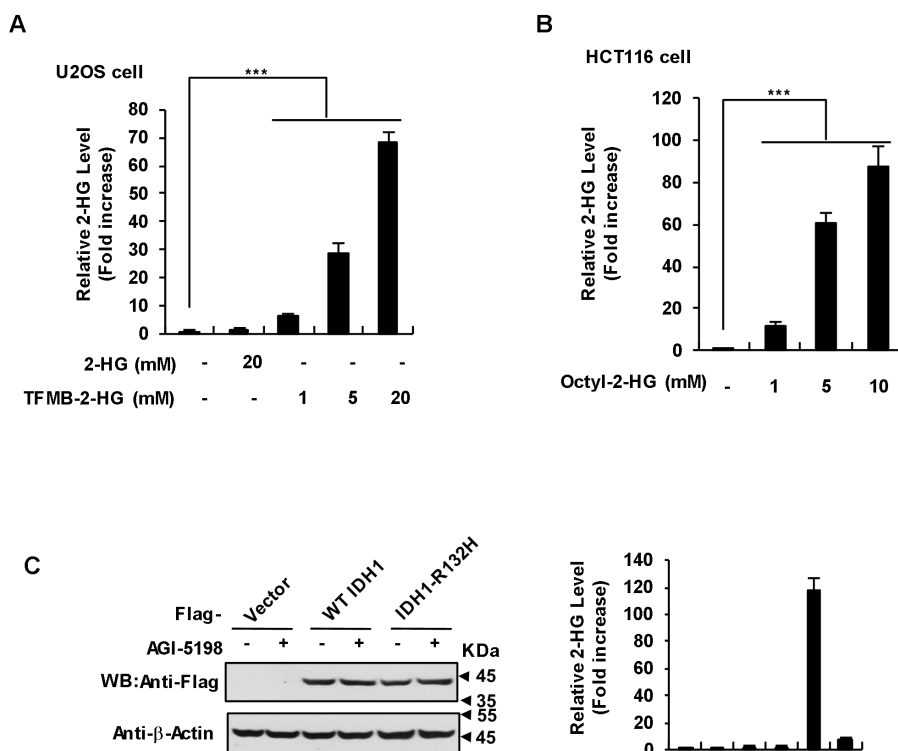

**Figure S1. LC-MS analysis of intracellular 2-HG level. (A)** U2OS cells were treated with various concentrations of TFMB-2-HG indicated for 8h. Cells were washed with PBS three times, the cell extracts were subjected to LC-MS for analysis of relative 2-HG levels. Error bars show the standard deviation of three independent experiments (\*\* $p < 0.001$ , unpaired Student's  $t$  test). **(B)** HCT116 cells were treated with various concentrations of Octyl-2-HG indicated for 8h. Results were presented as in (A). **(C)** HCT116 cells were infected with control lentivirus or lentivirus expressing Flag-WT IDH1 or IDH1-R132H. At 48 hr post-infection, cells were treated with or without 1.5  $\mu$ M AGI-5198 for 2 days, followed by measurement of 2-HG levels by LC-MS. Left: WB to detect the indicated proteins. Right: Quantitation of 2-HG levels using LC-MS. Data are shown as means  $\pm$  S.D. (n=3).

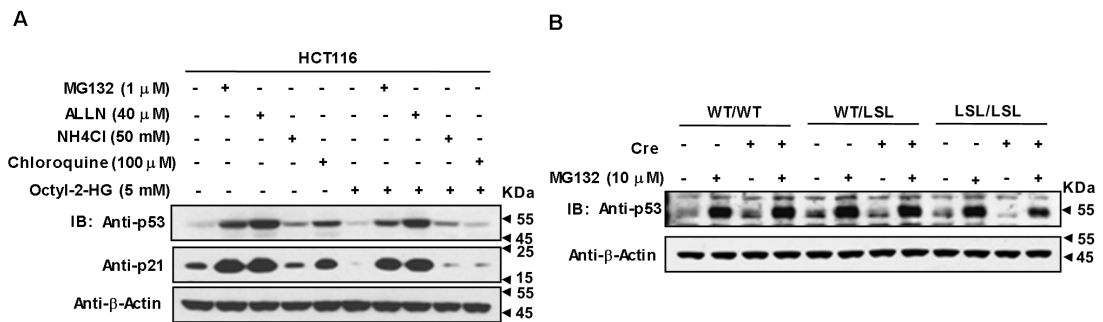

**Figure S2. Effect of protease inhibitors on p53 protein level. (A)** Western blot to detect p53 in HCT116 cells that were treated with Octyl-2-HG alone or in combination with the proteasome inhibitor MG132, the calpain inhibitor ALLN, or the lysosome inhibitors NH4Cl and chloroquine for 8 hr. **(B)** WB determination of p53 protein level in MEF treated with or without proteasome inhibitor MG132 for 8 hr.

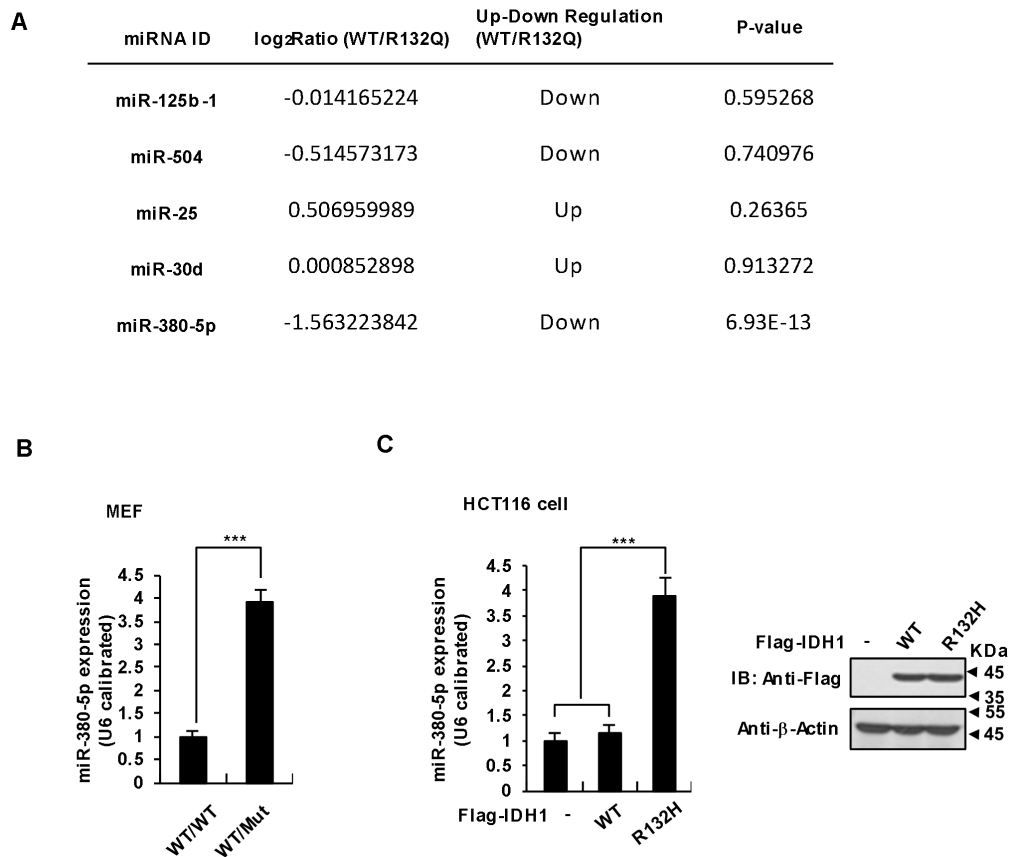

**Figure S3. miR-380-5p were dramatically upregulated in IDH1 mutant cells.** (A) The expression of multiple miRNAs in liver samples from IDH1 WT and mutant mice determined by a sequencing-based RNA profiling analysis. (B) The expression of miR-380-5p in MEF with indicated genotypes were analyzed with qRT-PCR and normalized to U6, mean±SD of three independent experiments is shown (\*\*\*) $p < 0.001$ , unpaired Student's *t* test). (C) HCT116 cells were transfected with Flag-tagged wildtype (WT) IDH1 or its R132H mutant. The expression of miR-380-5p is shown as in (B).

A

miR-380-5p: 3'-CGCGUACAAGAU ACC AGUUGGU-5'  
 Human p53 3'-UTR putative Site 1: 5'-GTCAAGTCTCTGCTGGCCAGCCA3'  
 miR-380-5p binding sites: Site 2: 5'-TGACAACCTCTTGGTGAACCTTAGTACCTA-3'

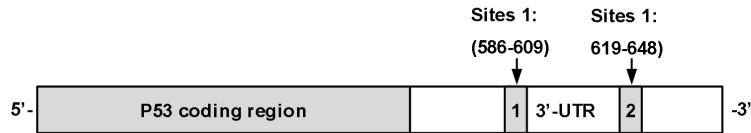

B.

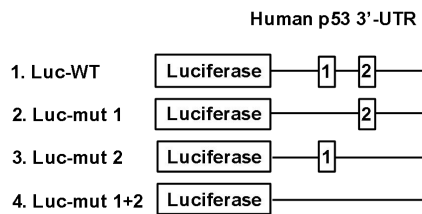

C.

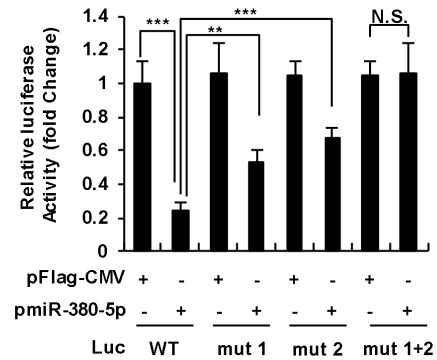

**Figure S4. Two miR-380-5p binding sites mediate the downregulation of p53 protein expression.** (A) Sequence of miR-380-5p and its putative binding sites in human p53 3' UTR. (B) Luciferase reporter constructs containing wildtype p53 3' UTR or its mutants with either one or both of the putative binding sites deleted. (C) The miR-380-5p binding sites 1 and 2 in human p53 3' UTR are responsible for its downregulation. HCT116 cells were transfected with luciferase constructs described in (B) together with miR-380-5p expression plasmid or control pFlag-CMV vector. 24 hr after transfection, luciferase activities were measured. Data shown are means±SD of three independent experiments (N.S., not significant, \*\* $p < 0.01$ , \*\*\* $p < 0.001$ , unpaired Student's  $t$  test).

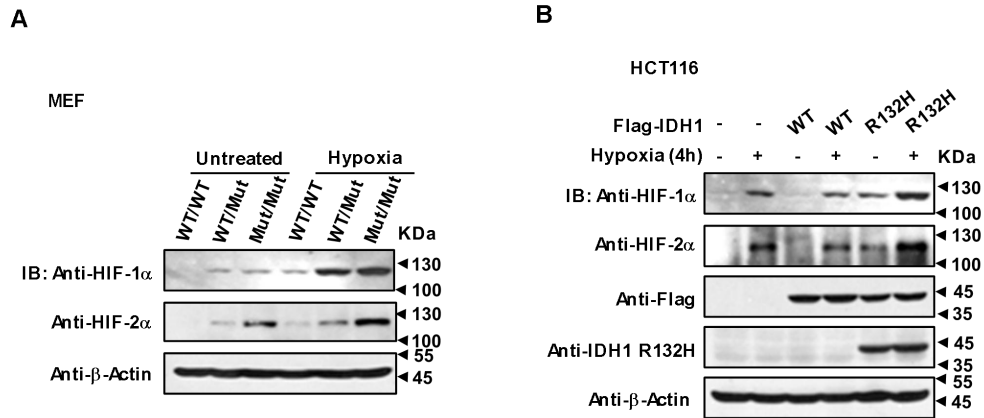

**Figure S5. HIFs were dramatically upregulated in IDH1 mutant cells. (A)** WB determination of HIF protein levels in MEF of the indicated genotypes under both normoxia and hypoxia condition. **(B)** WB determination of HIF protein levels in HCT116 cells transfected with Flag-tagged WT IDH1 or its R132H mutant under both normoxia and hypoxia condition.

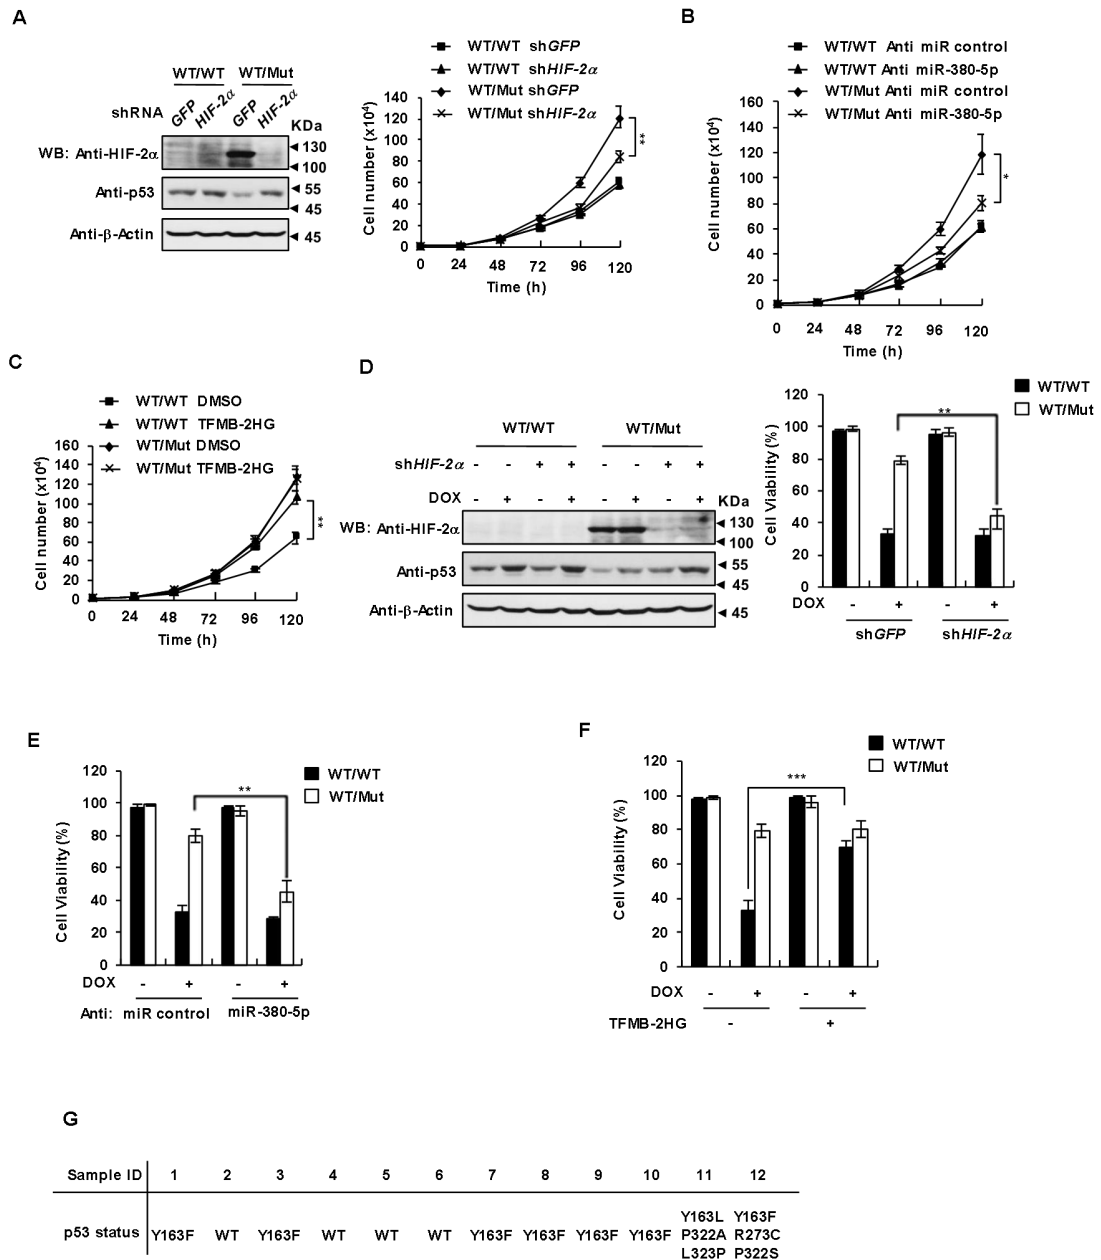

**Figure S6. p53 down regulation is involved in IDH1 mutant driven tumorigenesis. (A)** Knockdown of *HIF-2 $\alpha$*  significantly attenuated proliferation rate of IDH1 R132 mutant cells. Both *IDH1*<sup>WT/WT</sup> and *IDH1*<sup>WT/Mut</sup> cells were infected with lentiviruses expressing *HIF-2 $\alpha$*  shRNA or control shRNA. At 36 hr after infection, proliferation rates were determined by growth curves (Right panel). Means $\pm$ SD, n=3 independent experiments, are shown (\*\**p*<0.01, unpaired Student's *t* test). Proteins in total cell lysates of the same cell lines were determined by WB (Left panel). **(B)** Inhibition of miR-380-5p markedly suppressed proliferation rate of IDH1 R132 mutant cells. Both *IDH1*<sup>WT/WT</sup> and *IDH1*<sup>WT/Mut</sup> cells were transfected with chemically synthesized single stranded Anti-miR-380-5p oligonucleotides. 48 hr after transfection, proliferation rates were determined by growth curves (Right panel). Data are presented as in A (\**p*<0.05, unpaired Student's *t* test). **(C)** 2-HG dramatically increased proliferation rate of *IDH1*<sup>WT/WT</sup> cells but not *IDH1*<sup>WT/Mut</sup> cells. *IDH1*<sup>WT/WT</sup> and *IDH1*<sup>WT/Mut</sup>

MEFs were cultured with or without 20 mM TFMB-2-HG. Proliferation rates were determined as in (A) (\*\* $p < 0.01$ , unpaired Student's  $t$  test). **(D)** *HIF-2 $\alpha$*  Knockdown sensitizes IDH1 R132 mutant cells to DOX-induced apoptosis. *IDH1<sup>WT/WT</sup>* and *IDH1<sup>WT/Mut</sup>* MEF cells were infected with lentiviruses expressing *HIF-2 $\alpha$*  shRNA or control shRNA. At 36 hr after infection, cells were treated with or without 2.5  $\mu$ M DOX for 16 hr. The percentages of surviving cells (Annexin V negative) were determined by a flow cytometer. Data are presented as means $\pm$ SD of three independent experiments (\*\* $p < 0.01$ , unpaired Student's  $t$ -test). **(E)** Inhibition of miR-380-5p efficiently antagonizes the insensitivity of *IDH1<sup>WT/Mut</sup>* MEFs to DOX induced apoptosis. Both *IDH1<sup>WT/WT</sup>* and *IDH1<sup>WT/Mut</sup>* cells were transfected with chemically synthesized single stranded Anti-miR-380-5p oligonucleotides. 48 hr after transfection, cells were treated with 2.5  $\mu$ M DOX for another 16 hr. The percentages of surviving cells were determined as in (D). **(F)** 2-HG desensitized *IDH1<sup>WT/WT</sup>* cells rather than *IDH1<sup>WT/Mut</sup>* cells to DOX-induced apoptosis. *IDH1<sup>WT/WT</sup>* and *IDH1<sup>WT/Mut</sup>* MEFs were treated with 2.5  $\mu$ M DOX together with or without 20 mM TFMB-2-HG. The percentages of surviving cells were determined as in (D) (\*\* $p < 0.001$ , unpaired Student's  $t$  test). **(G)** Sanger sequencing result showing the p53 genotype in glioma samples used in Figure 7E.
